# Supplementary material for: Quasi-2D Bi0.775Ln0.225O1.5 (Ln = La, Pr, Nd, Sm, Eu): reversible iodine intercalation and their evaluation as the anode in the lithium-ion battery system
Source: Royal Society of Chemistry journal article supplement (doi:10.1039/d3dt03834c), 2024-01-01
Supplement: d3dt03834c1.pdf [file d3dt03834c1.pdf]

(†ESI) Electronic Supplementary Information for

Quasi-2D  $\text{Bi}_{0.775}\text{Ln}_{0.225}\text{O}_{1.5}$  (Ln = La, Pr, Nd, Sm, Eu): Reversible iodine intercalation  
and their evaluation as the anode in the lithium-ion battery system

Priyanka Yadav,<sup>1</sup> Shivangi Rao,<sup>1</sup> O.V. Sreejith,<sup>2</sup> Ramaswamy Murugan<sup>2</sup> and Rajamani

Nagarajan<sup>1\*</sup>

<sup>1</sup>Materials Chemistry Group, Department of Chemistry

University of Delhi, Delhi-110007 INDIA

<sup>2</sup>High Energy Density Batteries Research Laboratory, Department of Physics, Pondicherry

University, Puducherry 605 014, INDIA

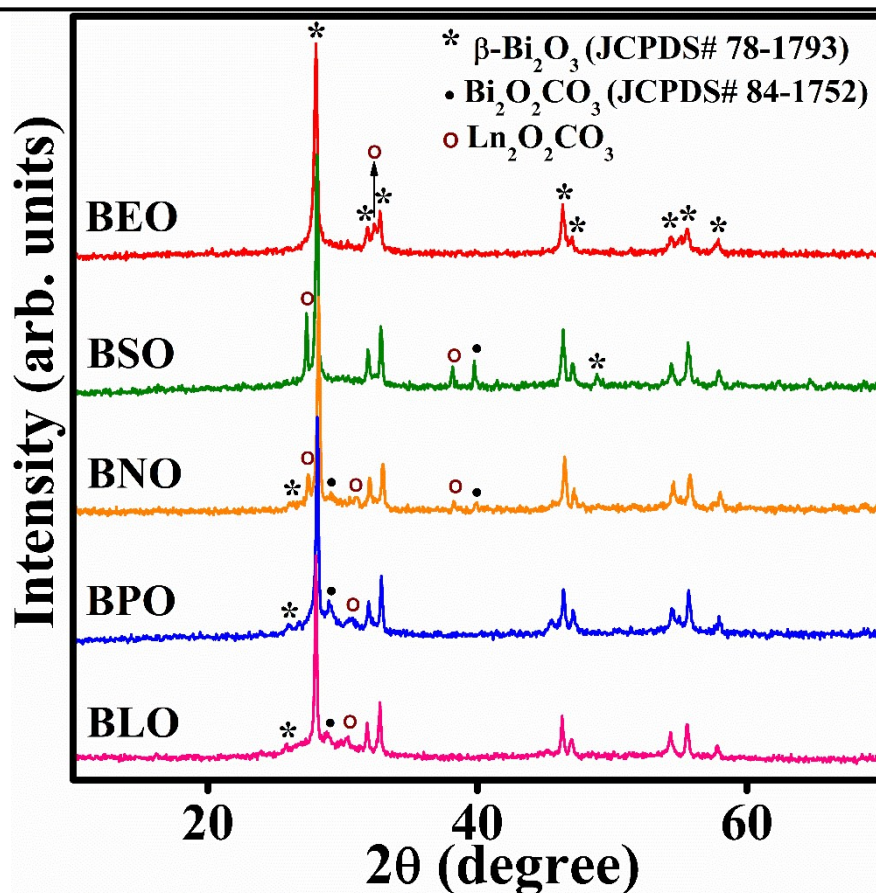

**Fig. S1** PXRD patterns of combusted ashes of  $\text{Bi}_2\text{O}_3\text{-Ln}_2\text{O}_3\text{-citric acid}$  complexes.  $\text{La}_2\text{O}_2\text{CO}_3$  (JCPDS# 84-1963),  $\text{Pr}_2\text{O}_2\text{CO}_3$  (JCPDS# 37-0805),  $\text{Nd}_2\text{O}_2\text{CO}_3$  (JCPDS# 37-0806),  $\text{Sm}_2\text{O}_2\text{CO}_3$  (JCPDS # 37-0807), and  $\text{Eu}_2\text{O}_2\text{CO}_3$  (JCPDS # 25-0334).

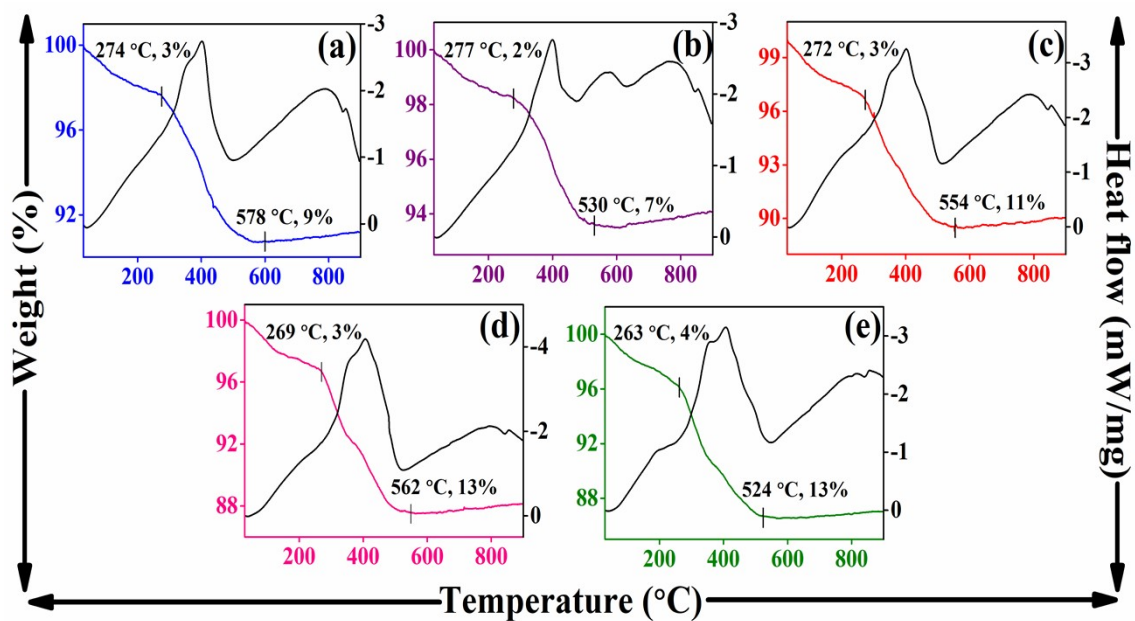

**Fig. S2** Simultaneous TG/DSC traces of combusted precursors of bismuth-rare earth metal-citric acid where the rare earth metals are La (a), Pr (b), Nd (c), Sm (d), and Eu (e).

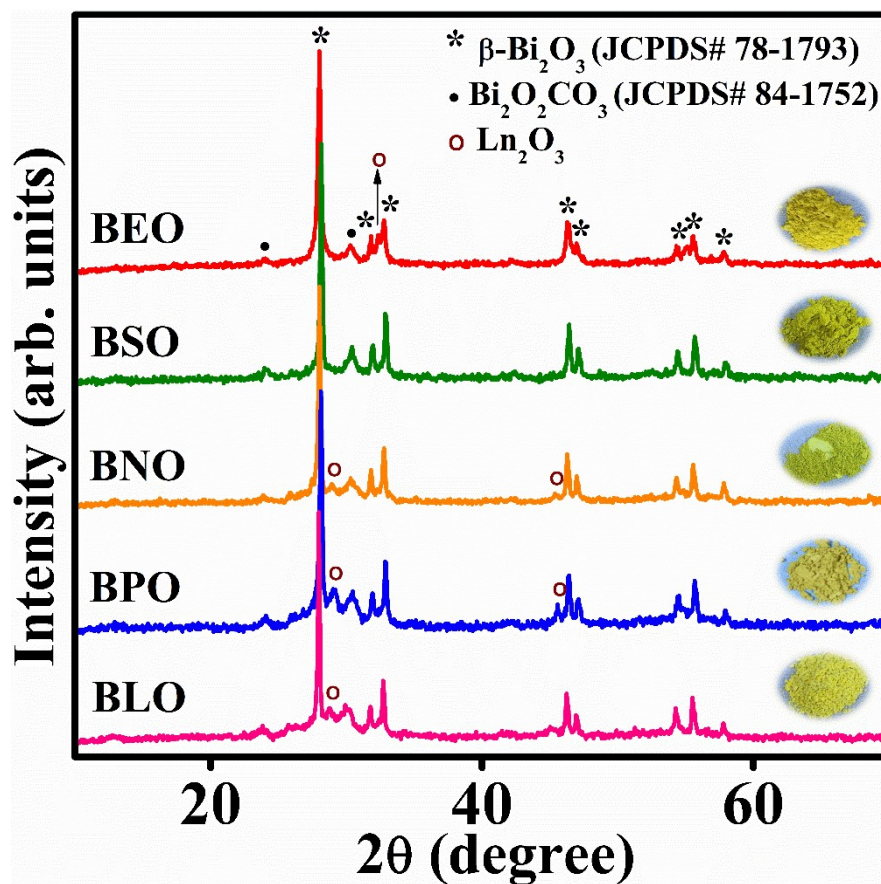

**Fig. S3** PXRD patterns of Bi<sub>0.775</sub>Ln<sub>0.225</sub>O<sub>1.5</sub> samples' ashes calcined at 270 °C. La<sub>2</sub>O<sub>3</sub> (JCPDS# 83-1355), Pr<sub>2</sub>O<sub>3</sub> (JCPDS# 78-0309), Nd<sub>2</sub>O<sub>3</sub> (JCPDS# 83-1353), Sm<sub>2</sub>O<sub>3</sub> (JCPDS# 19-1114) and Eu<sub>2</sub>O<sub>3</sub> (JCPDS# 19-0463).

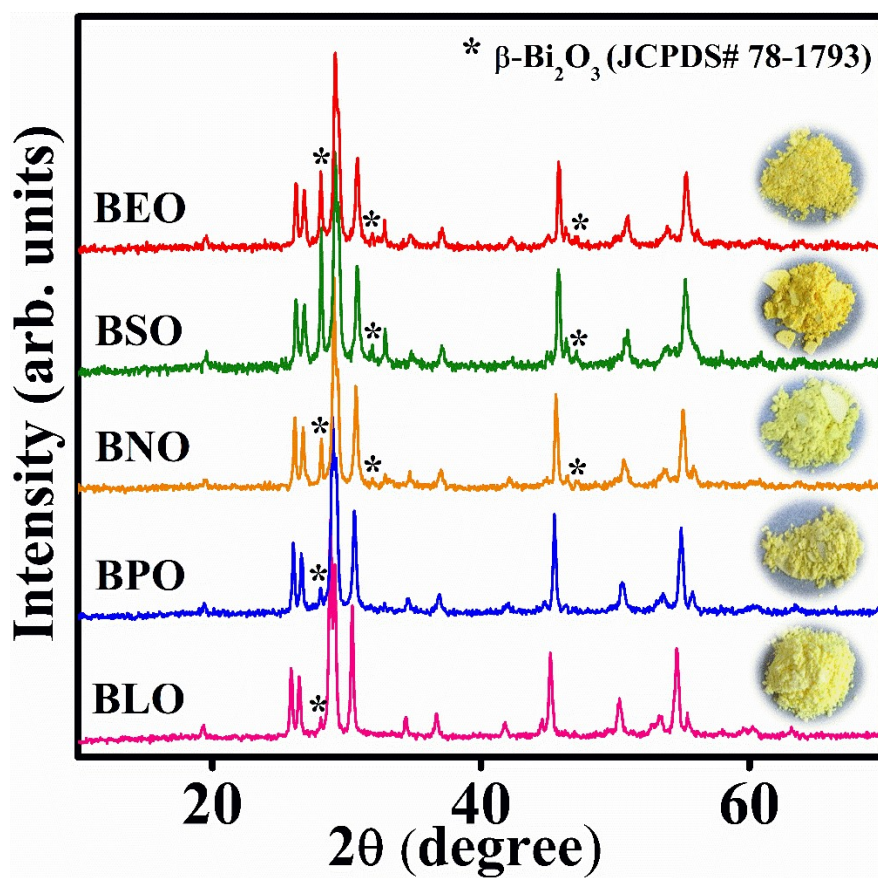

Fig. S4 PXRD patterns of  $\text{Bi}_{0.775}\text{Ln}_{0.225}\text{O}_{1.5}$  samples' ashes calcined at 550 °C.



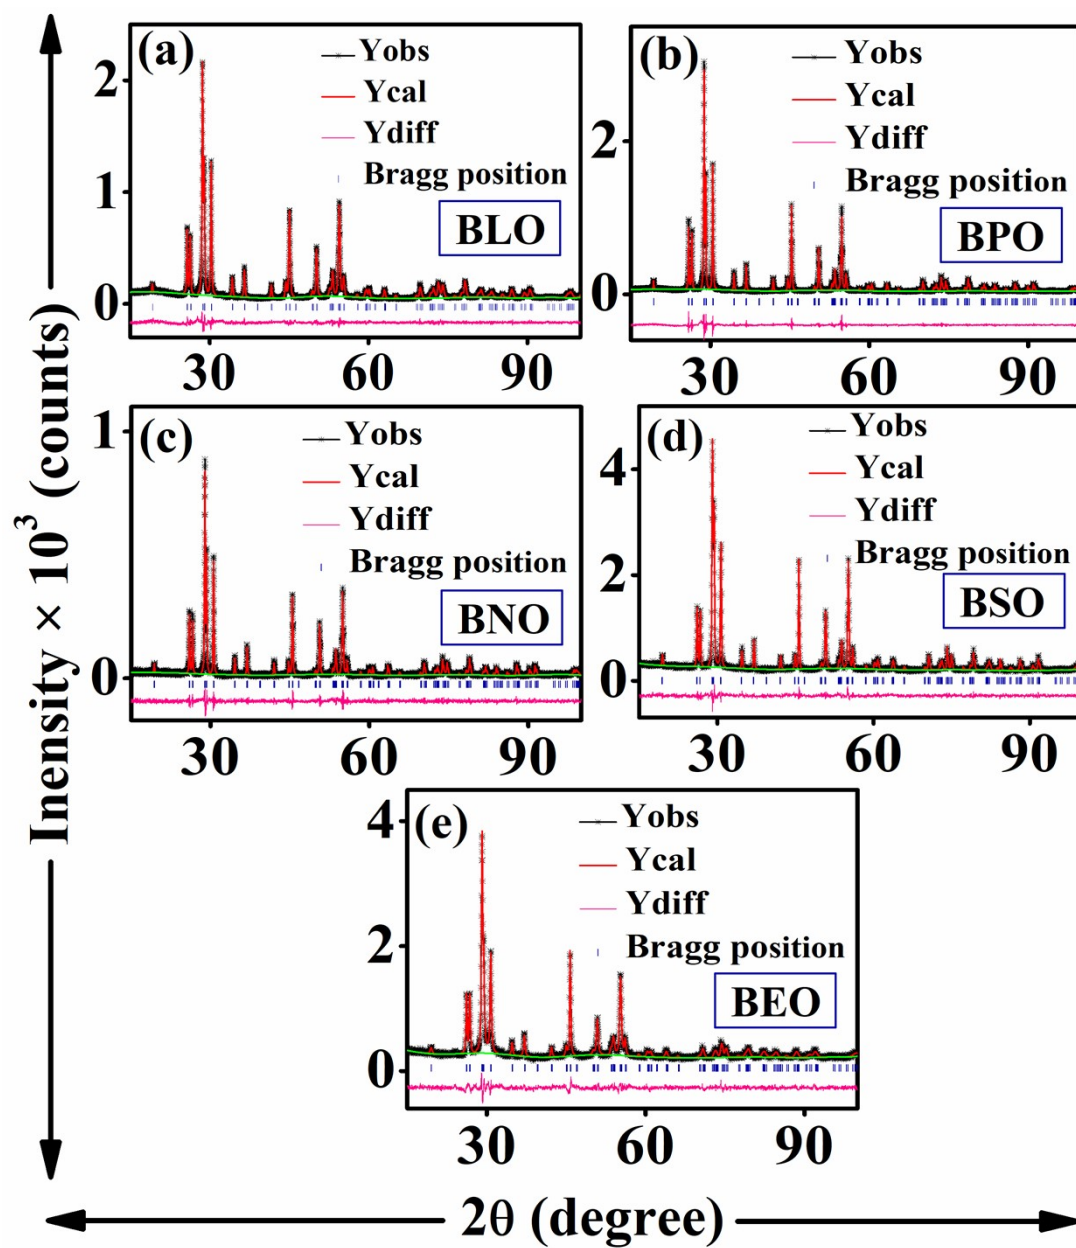

Fig. S5 Lattice refinement of the PXRD patterns of  $\text{Bi}_{0.775}\text{Ln}_{0.225}\text{O}_{1.5}$  by the Le Bail method.

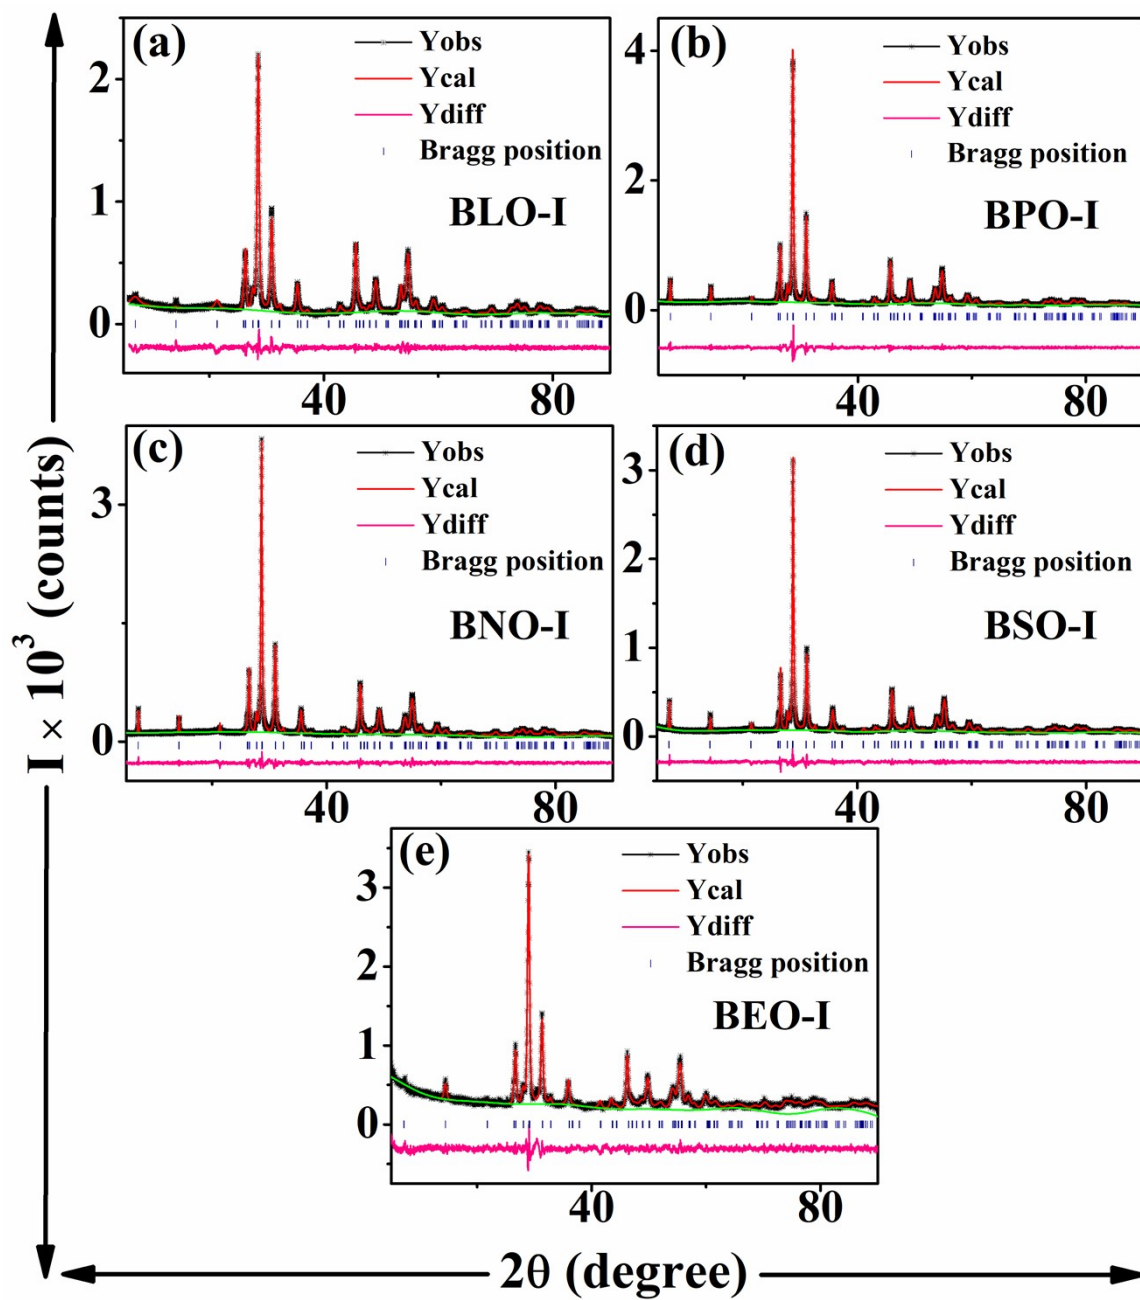

**Fig. S6** Lattice refinement of the PXRD patterns of iodine intercalated  $\text{Bi}_{0.775}\text{Ln}_{0.225}\text{O}_{1.5}$  by the Le Bail method.

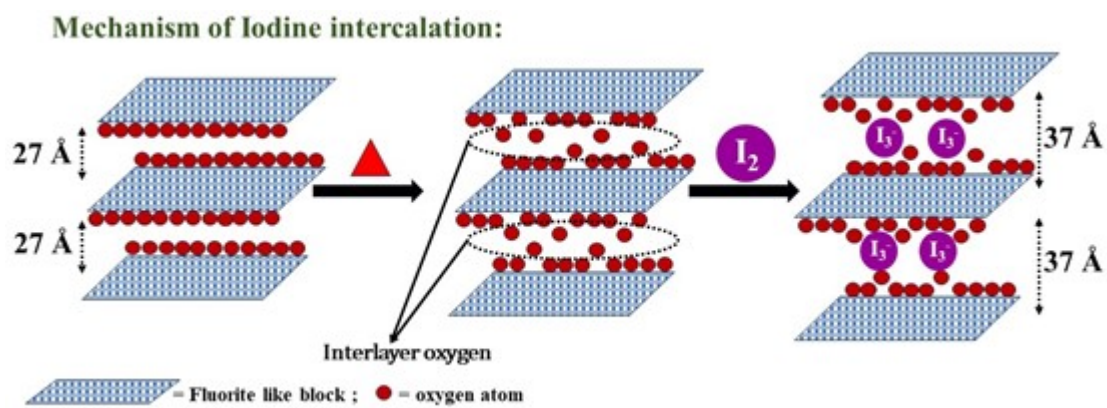

**Fig. S7** Schematic representation of steps involved in the intercalation of iodine species in  $Bi_{0.775}Ln_{0.225}O_{1.5}$ .

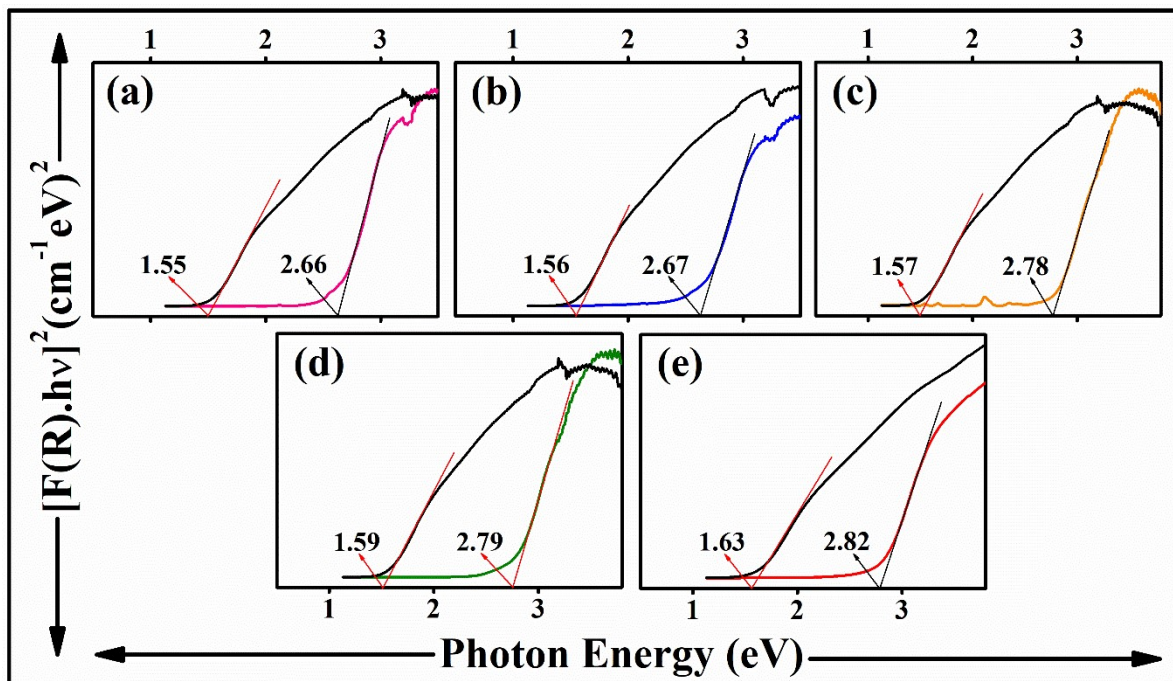

**Fig. S8(a)-(e)** Bandgap estimation using Tauc plots of BLO, BPO, BNO, BSO, BEO, BLO-I, BPO-I, BNO-I, BSO-I, and BEO-I samples.





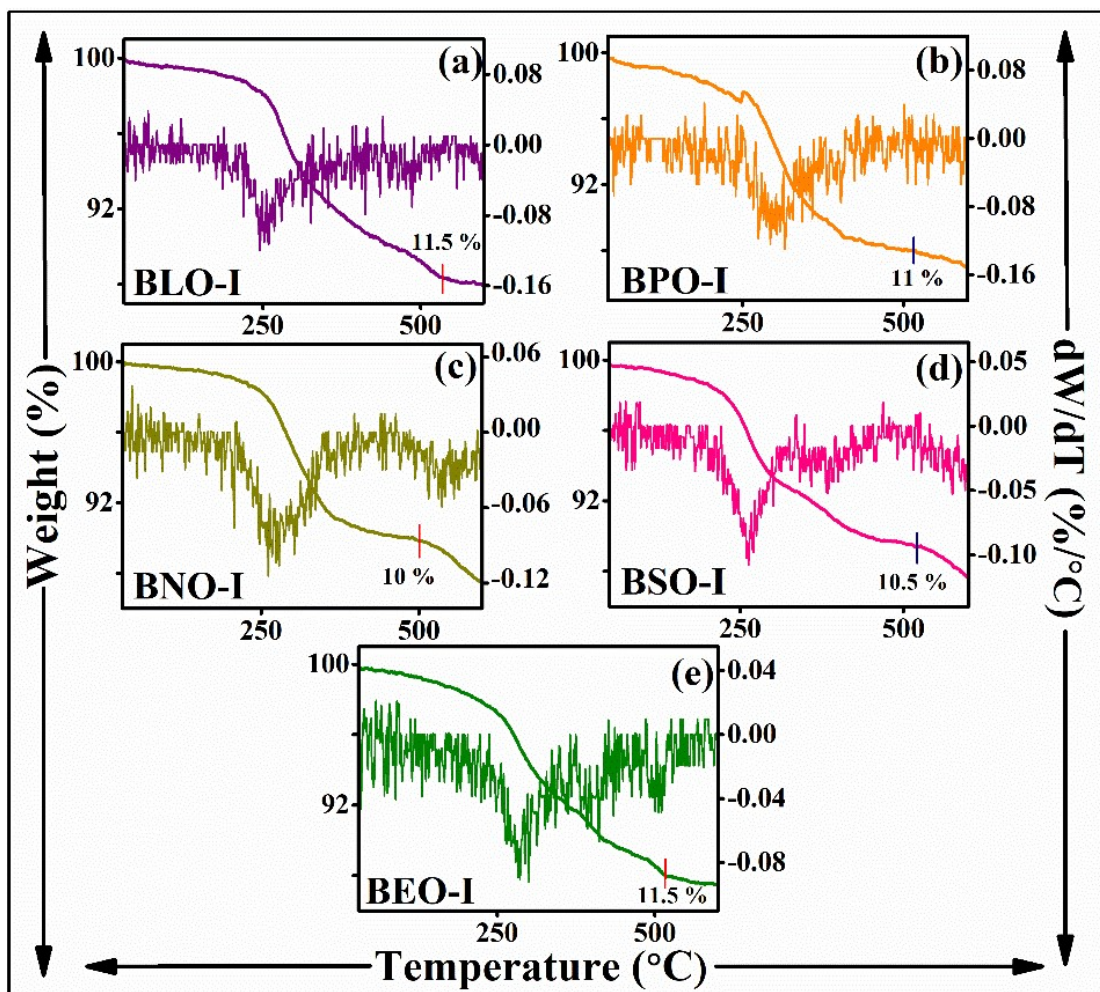

**Fig. S9** Thermogravimetric and derivative thermogravimetric traces of BLO-I, BPO-I, BNO-I, BSO-I, and BEO-I samples.

| Sample | Combusted ashes                                                                    | Calcined ashes                                                                     | Product after iodine intercalation                                                 | Product after iodine deintercalation                                                |
|--------|------------------------------------------------------------------------------------|------------------------------------------------------------------------------------|------------------------------------------------------------------------------------|-------------------------------------------------------------------------------------|
| BLO    | 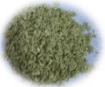  |   |   |   |
| BPO    |   |   |   |   |
| BNO    |   |   |   |   |
| BSO    |   |   |   |   |
| BEO*   |  |  |  |  |

\* calcined at 600 °C

**Fig. S10** Digital images of the combusted ashes, calcined products, products after iodine intercalation, and products after thermal iodine deintercalation of  $\text{Bi}_{0.775}\text{Ln}_{0.225}\text{O}_{1.5}$  samples.

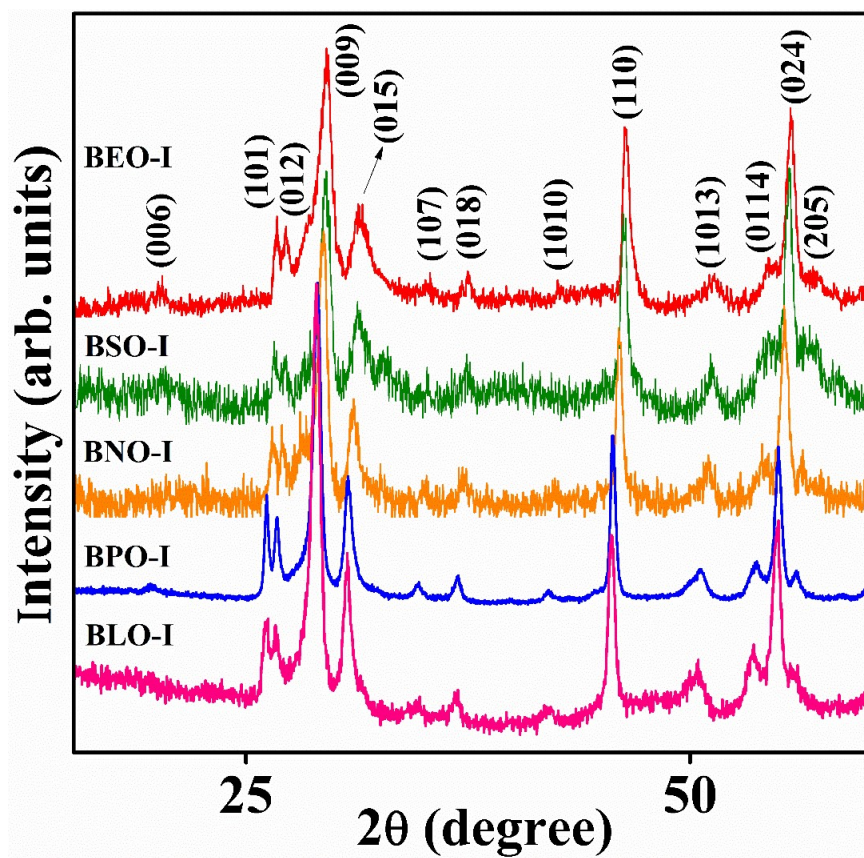

**Fig. S11** PXRD patterns of iodine intercalated Bi<sub>0.775</sub>Ln<sub>0.225</sub>O<sub>1.5</sub> samples after calcination in air at 600 °C for 6 h.

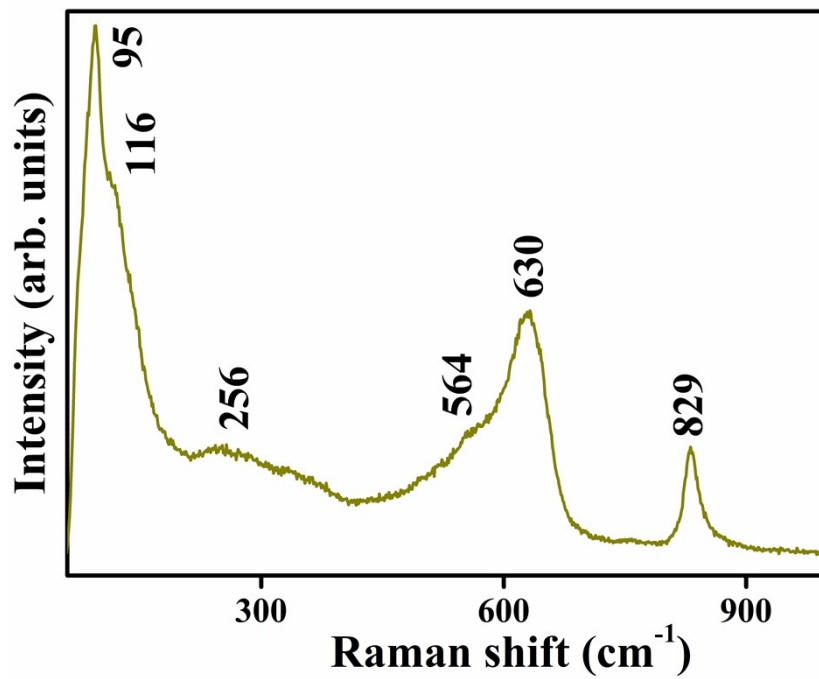

**Fig. S12** Raman spectrum of iodine deintercalated  $\text{Bi}_{0.775}\text{Pr}_{0.225}\text{O}_{1.5}$  sample.



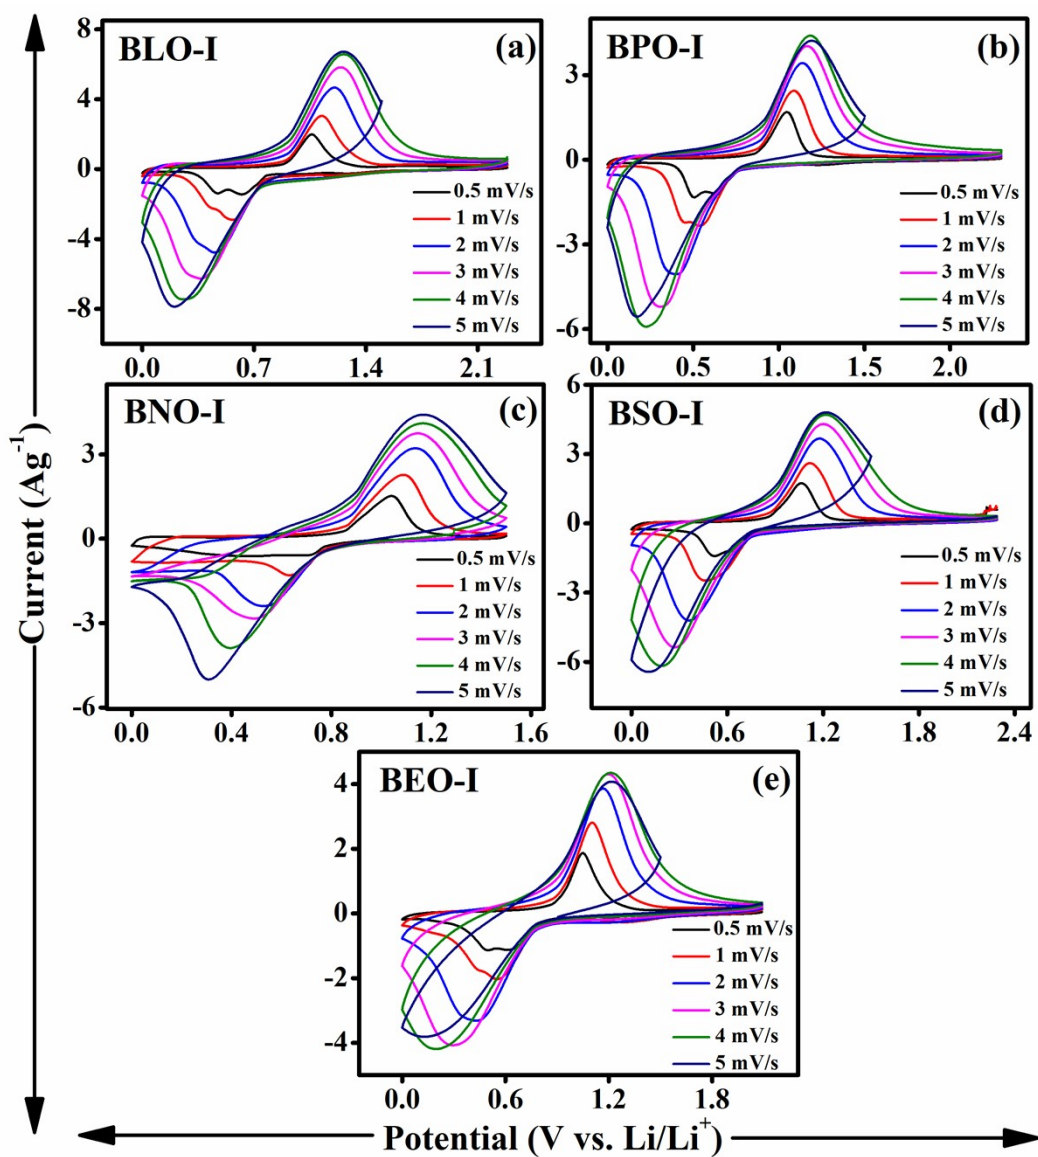

**Fig. S13** Cyclic voltammograms with different scan rates of (a) BLO-I, (b) BPO-I, (c) BNO-I, (d) BSO-I, and (e) BEO-I.

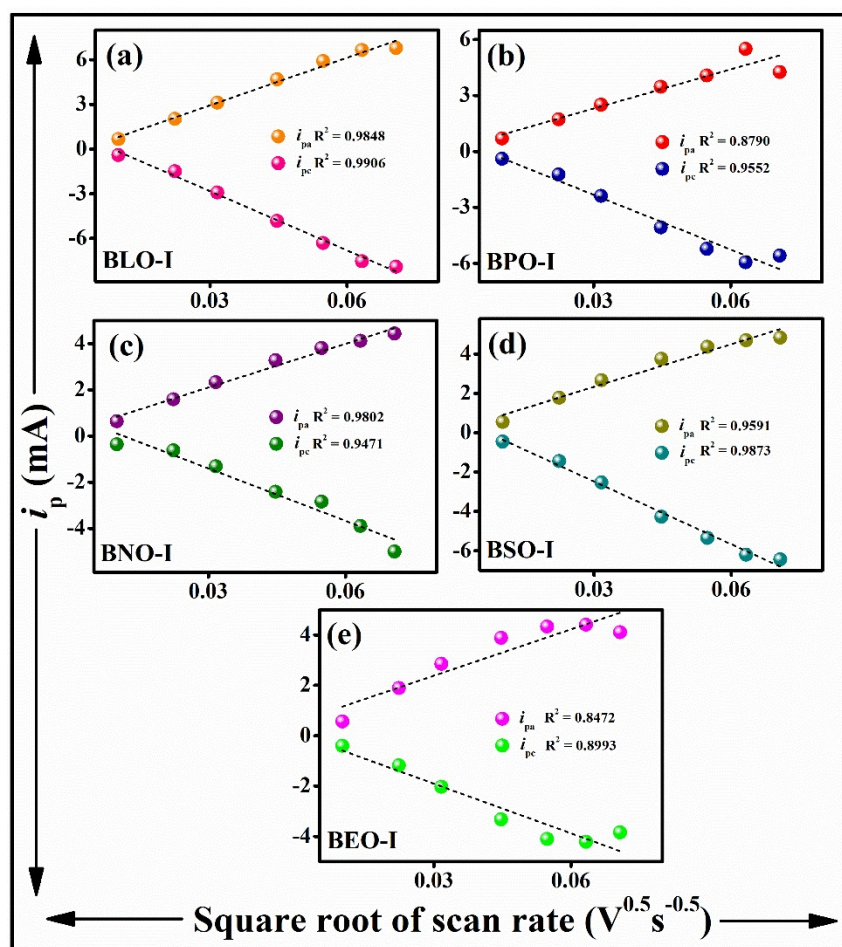

**Fig. S14** Relationship between anodic and cathodic peak current ( $i_{pa}$  and  $i_{pc}$ ) and the square root of scanning rates ( $v^{1/2}$ ) of BLO-I, BPO-I, BNO-I, BSO-I, and BEO-I samples.

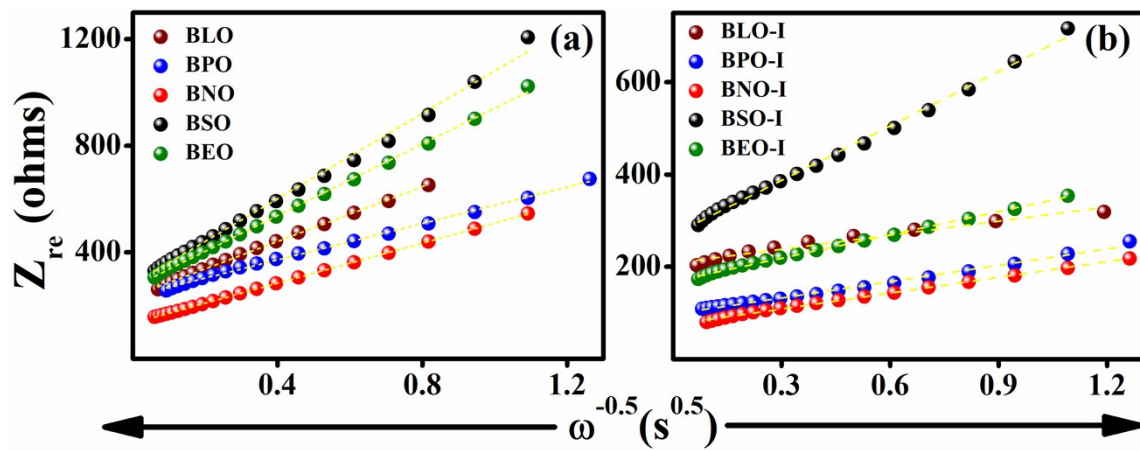

**Fig. S15** Frequency response of real part of the impedance of (a) BLO, BPO, BNO, BSO, and BEO samples, (b) BLO-I, BPO-I, BNO-I, BSO-I, and BEO-I samples.

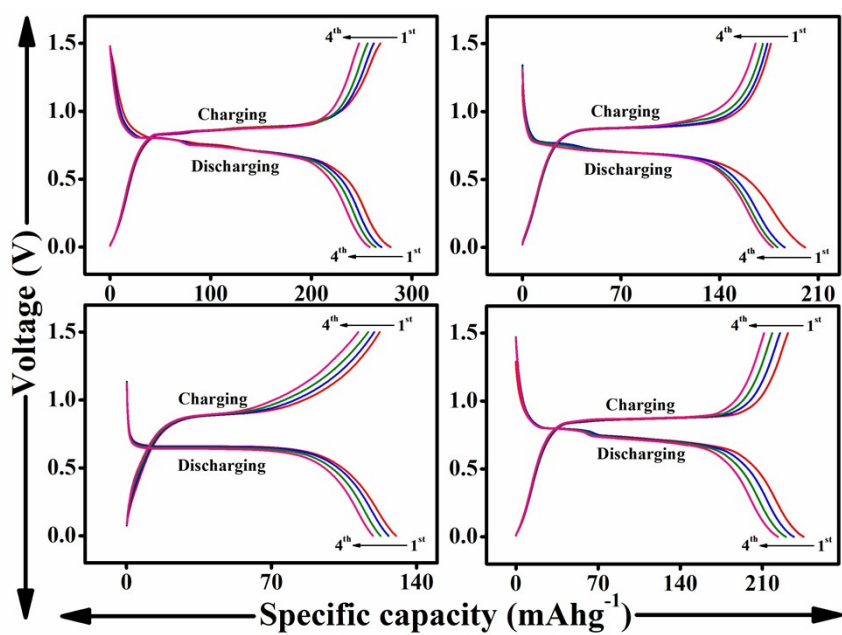

**Fig. S16** Galvanostatic charge-discharge performance of iodine intercalated  $\text{Bi}_{0.775}\text{La}_{0.225}\text{O}_{1.5}$  sample at (a) 10, (b) 20, (c) 50, (d) repeat 10  $\text{mA g}^{-1}$ .

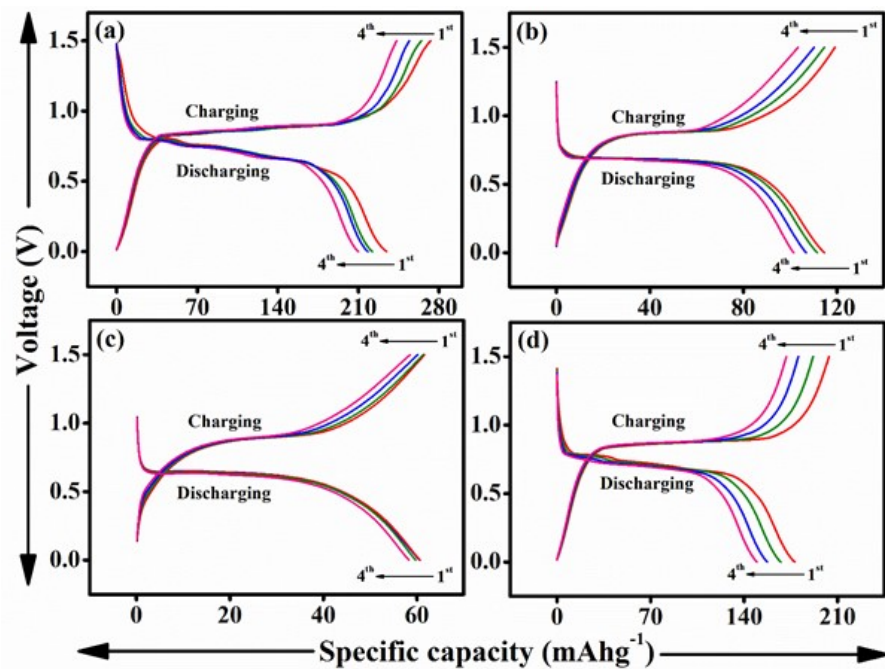

**Fig. S17** Galvanostatic charge-discharge performance of iodine intercalated  $\text{Bi}_{0.775}\text{Pr}_{0.225}\text{O}_{1.5}$  sample at (a) 10, (b) 20, (c) 50, (d) repeat 10  $\text{mA g}^{-1}$ .



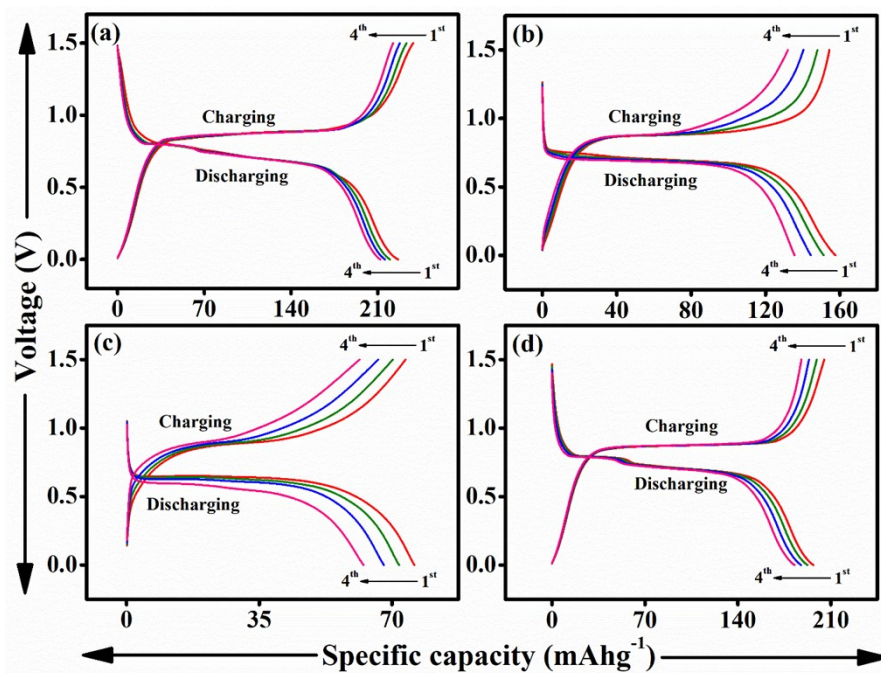

**Fig. S18** Galvanostatic charge-discharge performance of iodine intercalated  $\text{Bi}_{0.775}\text{Nd}_{0.225}\text{O}_{1.5}$  sample at (a) 10, (b) 20, (c) 50, and (d) repeat 10  $\text{mA g}^{-1}$ .

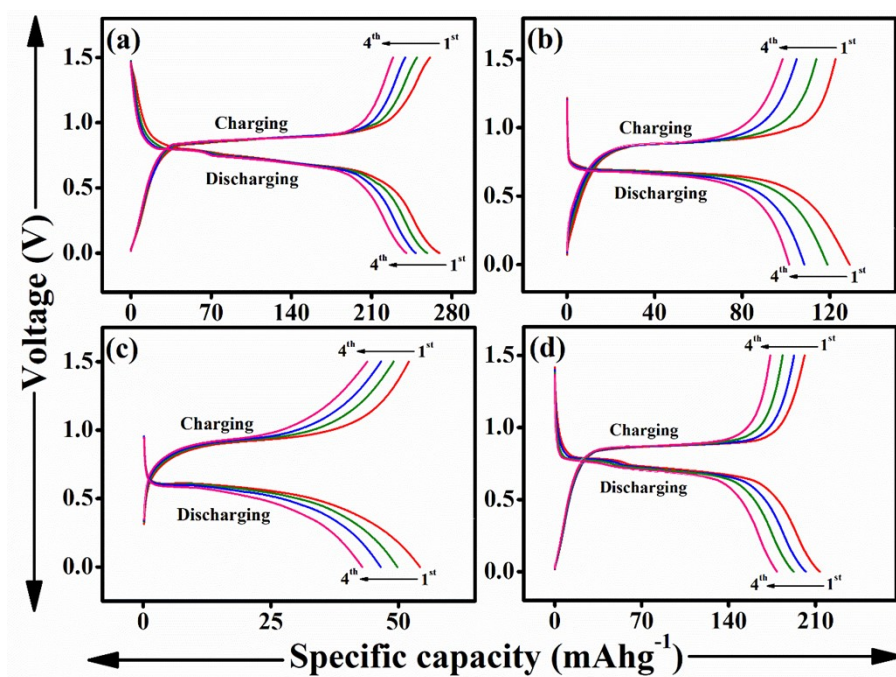

**Fig. S19** Galvanostatic charge-discharge performance of iodine intercalated  $\text{Bi}_{0.775}\text{Sm}_{0.225}\text{O}_{1.5}$  sample at (a) 10, (b) 20, (c) 50, (d) repeat 10  $\text{mA g}^{-1}$ .

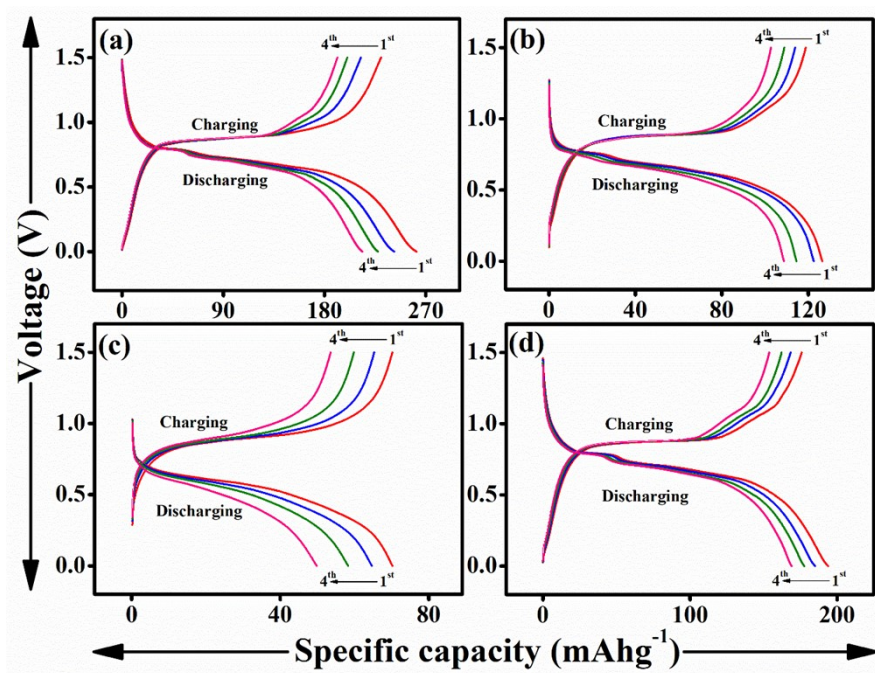

**Fig. S20** Galvanostatic charge-discharge performance of iodine intercalated  $\text{Bi}_{0.775}\text{Eu}_{0.225}\text{O}_{1.5}$  sample at (a) 10, (b) 20, (c) 50, (d) repeat 10  $\text{mA g}^{-1}$ .

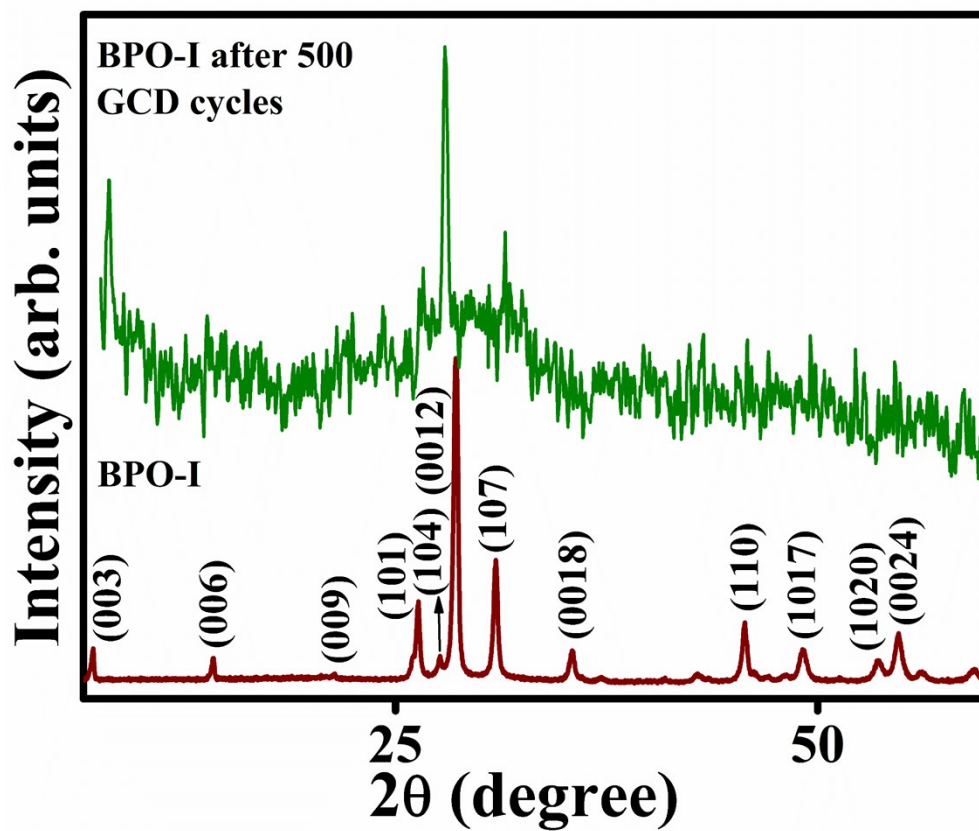

**Fig. S21** PXRD pattern of the electroactive BPO-I before and after its use in charge-discharge experiments (500 cycles)

**Table S1** Lattice parameters estimated from the lattice refinement of the PXRD patterns of the  $\text{Bi}_{0.775}\text{Ln}_{0.225}\text{O}_{1.5}$  (Ln = La, Pr, Nd, Sm, and Eu) samples by the Le Bail method in hexagonal symmetry ( $R\text{-}3m$  (#166)).

| Formula                       | $\text{Bi}_{0.775}\text{La}_{0.225}\text{O}_{1.5}$ | $\text{Bi}_{0.775}\text{Pr}_{0.225}\text{O}_{1.5}$ | $\text{Bi}_{0.775}\text{Nd}_{0.225}\text{O}_{1.5}$ | $\text{Bi}_{0.775}\text{Sm}_{0.225}\text{O}_{1.5}$ | $\text{Bi}_{0.775}\text{Eu}_{0.225}\text{O}_{1.5}$ |
|-------------------------------|----------------------------------------------------|----------------------------------------------------|----------------------------------------------------|----------------------------------------------------|----------------------------------------------------|
| $a$ (Å)                       | 4.0235 (4)                                         | 4.0081 (5)                                         | 3.9814 (7)                                         | 3.9879 (7)                                         | 3.9593 (9)                                         |
| $c$ (Å)                       | 27.7345 (5)                                        | 27.6138 (5)                                        | 27.4886 (8)                                        | 27.5040 (5)                                        | 27.3165 (2)                                        |
| Cell volume (Å <sup>3</sup> ) | 388.834 (8)                                        | 384.195 (8)                                        | 378.201 (8)                                        | 376.816 (7)                                        | 370.849 (2)                                        |
| Temp. (°C)                    | 25                                                 | 25                                                 | 25                                                 | 25                                                 | 25                                                 |
| No. of data points            | 8499                                               | 8499                                               | 8499                                               | 3235                                               | 3235                                               |
| $2\theta$ range               | 15-100°                                            | 15-100°                                            | 15-100°                                            | 15-100°                                            | 15-100°                                            |
| $R_p$                         | 0.0607                                             | 0.0780                                             | 0.1304                                             | 0.0530                                             | 0.0593                                             |
| $R_{wp}$                      | 0.0806                                             | 0.1015                                             | 0.1766                                             | 0.0685                                             | 0.0750                                             |
| $\chi^2$                      | 0.7033                                             | 0.8993                                             | 0.8914                                             | 1.500                                              | 1.835                                              |



**Table S2** Lattice parameters estimated from the lattice refinement of the PXRD patterns of the iodine intercalated  $\text{Bi}_{0.775}\text{Ln}_{0.225}\text{O}_{1.5}$  (Ln = La, Pr, Nd, Sm, and Eu) samples by the Le Bail method in hexagonal symmetry ( $R\text{-}3m$  (#166)).

| Formula                       | $\text{Bi}_{0.775}\text{La}_{0.225}\text{O}_{1.5}$ | $\text{Bi}_{0.775}\text{Pr}_{0.225}\text{O}_{1.5}$ | $\text{Bi}_{0.775}\text{Nd}_{0.225}\text{O}_{1.5}$ | $\text{Bi}_{0.775}\text{Sm}_{0.225}\text{O}_{1.5}$ | $\text{Bi}_{0.775}\text{Eu}_{0.225}\text{O}_{1.5}$ |
|-------------------------------|----------------------------------------------------|----------------------------------------------------|----------------------------------------------------|----------------------------------------------------|----------------------------------------------------|
| $a$ (Å)                       | 3.9768 (8)                                         | 3.9704 (7)                                         | 3.9496 (8)                                         | 3.9487 (7)                                         | 3.9098 (22)                                        |
| $c$ (Å)                       | 37.465 (24)                                        | 37.456 (14)                                        | 37.3654 (14)                                       | 37.3125 (15)                                       | 36.753 (5)                                         |
| Cell volume (Å <sup>3</sup> ) | 513.133 (27)                                       | 511.366 (14)                                       | 504.785 (15)                                       | 503.844 (15)                                       | 486.57 (5)                                         |
| Temp. (°C)                    | 25                                                 | 25                                                 | 25                                                 | 25                                                 | 25                                                 |
| No. of data points            | 9701                                               | 9700                                               | 9701                                               | 9701                                               | 3237                                               |
| $2\theta$ range               | 5-90°                                              | 5-90°                                              | 5-90°                                              | 5-90°                                              | 5-90°                                              |
| $R_p$                         | 0.0565                                             | 0.0579                                             | 0.0566                                             | 0.0624                                             | 0.0611                                             |
| $R_{wp}$                      | 0.0739                                             | 0.0761                                             | 0.0745                                             | 0.0822                                             | 0.0775                                             |
| $\chi^2$                      | 0.8026                                             | 0.8847                                             | 0.7884                                             | 0.6813                                             | 2.01                                               |

**Table S3** Comparison of electrochemical performance of 2D materials as anode in LIBs.

| 2D Materials based on                                                          | System                                               | Initial discharge capacity (mAh/g)/ current density(mA/g) | Ref.             |
|--------------------------------------------------------------------------------|------------------------------------------------------|-----------------------------------------------------------|------------------|
| Chalcogenides                                                                  | GaS nanosheets                                       | 1730/100                                                  | 1                |
|                                                                                | GaSe nanosheets                                      | 1100/300                                                  |                  |
|                                                                                | WS <sub>2</sub> NTs                                  | 768/100                                                   | 2                |
|                                                                                | CoSe                                                 | 550/100                                                   | 3                |
|                                                                                | MoSe <sub>2</sub>                                    | 851.1/100                                                 | 4                |
|                                                                                | TiS <sub>2</sub> Nanosheets                          | ~300/50                                                   | 5                |
|                                                                                | NiS                                                  | 1311/100                                                  | 6                |
|                                                                                | NiSe <sub>2</sub>                                    | 992/100                                                   |                  |
|                                                                                | GeS                                                  | 1232/0.1C                                                 | 7                |
|                                                                                | GeS <sub>2</sub>                                     | 1099/0.1C                                                 |                  |
| SnS                                                                            | 867/0.1C                                             |                                                           |                  |
| SnS <sub>2</sub>                                                               | 647/0.1C                                             |                                                           |                  |
| MXene                                                                          | V <sub>2</sub> C                                     | 467/50                                                    | 8                |
|                                                                                | Ti <sub>2</sub> C                                    | 160/0.1C                                                  | 9                |
|                                                                                | Nb <sub>2</sub> CT <sub>x</sub>                      | 985/50                                                    | 10               |
|                                                                                | Ti <sub>3</sub> C <sub>2</sub> T                     | 123.6/1C                                                  | 11               |
|                                                                                | Mo <sub>2</sub> C                                    | 136/10                                                    | 12               |
|                                                                                | Few-layer Nb <sub>2</sub> CT <sub>x</sub>            | 746/50                                                    | 13               |
| Bismuth oxyhalides                                                             | Bi <sub>0.775</sub> Fe <sub>0.3</sub> OCl nanosheets | 555/50                                                    | 14               |
|                                                                                | BiOCl                                                | 633/100                                                   | 15               |
|                                                                                | BiOBr                                                | 605/100                                                   |                  |
|                                                                                | BiOI                                                 | 717/30                                                    | 16               |
| <b>Iodine intercalated Bi<sub>0.775</sub>La<sub>0.225</sub>O<sub>1.5</sub></b> |                                                      | <b>278/10</b>                                             | <b>This work</b> |
| <b>Iodine intercalated Bi<sub>0.775</sub>Pr<sub>0.225</sub>O<sub>1.5</sub></b> |                                                      | <b>234/10</b>                                             |                  |
| <b>Iodine intercalated Bi<sub>0.775</sub>Nd<sub>0.225</sub>O<sub>1.5</sub></b> |                                                      | <b>227/10</b>                                             |                  |
| <b>Iodine intercalated Bi<sub>0.775</sub>Sm<sub>0.225</sub>O<sub>1.5</sub></b> |                                                      | <b>250/10</b>                                             |                  |
| <b>Iodine intercalated Bi<sub>0.775</sub>Eu<sub>0.225</sub>O<sub>1.5</sub></b> |                                                      | <b>273/10</b>                                             |                  |

## References

- 1 C. Zhang, S. H. Park, O. Ronan, A. Harvey, A. Seral-Ascaso, Z. Lin, N. McEvoy, C. S. Boland, N. C. Berner, G. S. Duesberg, and P. Rozier, *Small* 2017, **13**, 1701677-1701688.
- 2 R. Chen, T. Zhao, W. Wu, F. Wu, L. Li, J. Qian, R. Xu, H. Wu, H. M. Albishri, A. S. Al-Bogami, and D. A. El-Hady, *Nano Lett.* 2014, **14**, 5899-5904.
- 3 Y. Li, Y. Xu, Z. Wang, Y. Bai, K. Zhang, R. Dong, Y. Gao, Q. Ni, F. Wu, Y. Liu, and C. Wu, *Adv. Energy Mater.* 2018, **8**, 1800927-1800935.
- 4 Y. Liu, M. Zhu, and D. Chen, *J. Mater. Chem. A*, 2015, **3**, 11857-11862.
- 5 D. Y. Oh, Y. E. Choi, D. H. Kim, Y. G. Lee, B. S. Kim, J. Park, H. Sohn, and Y. S. Jung, *J. Mater. Chem. A* 2016, **4**, 10329-10335.
- 6 H. Fan, H. Yu, X. Wu, Y. Zhang, Z. Luo, H. Wang, Y. Guo, S. Madhavi, and Q. Yan, *ACS Appl. Mater. Interfaces* 2016, **8**, 25261-25267.
- 7 H. S. Im, Y. R. Lim, Y. J. Cho, J. Park, E. H. Cha, and H. S. Kang, *J. Phys. Chem. C* 2014, **118**, 21884-21888.
- 8 F. Liu, J. Zhou, S. Wang, B. Wang, C. Shen, L. Wang, Q. Hu, Q. Huang, and A. Zhou, *J. Electrochem. Soc.* 2017, **164**, A709-A713.
- 9 M. Naguib, J. Come, B. Dyatkin, V. Presser, P. L. Taberna, P. Simon, M. W. Barsoum, and Y. Gogotsi, *Electrochem. Commun.* 2012, **16**, 61-64.
- 10 J. Zhao, J. Wen, J. Xiao, X. Ma, J. Gao, L. Bai, H. Gao, X. Zhang, and Z. Zhang, *J. Energy Chem.* 2021, **53**, 387-395.
- 11 D. D. Sun, M. S. Wang, Z. Y. Li, G. X. Fan, L. Z. Fan, and A. G. Zhou, *Electrochem. Commun.* 2014, **47**, 80-83.
- 12 J. Mei, G. A. Ayoko, C. Hu, J. M. Bell, and Z. Sun, *Sustain. Mater. Technol.* 2020, **25**, e00156.
- 13 J. B. Zhao, J. Wen, L. N. Bai, J. P. Xiao, R. D. Zheng, X. Y. Shan, L. Li, H. Gao, and X. T. Zhang, *Dalton Trans.* 2019, **48**, 14433-14439.
- 14 Y. Myung, J. Choi, F. Wu, S. Banerjee, E. H. Majzoub, J. Jin, S. U. Son, P. V. Braun, and P. Banerjee, *ACS Appl. Mater. Interfaces* 2017, **9**, 14187-14196.
- 15 L. Ye, L. Wang, H. Xie, Y. Su, X. Jin, and C. Zhang, *Energy Technol.* 2015, **3**, 1115-1120.
- 16 C. Chen, P. Hu, X. Hu, Y. Mei, and Y. Huang, *Chem. Commun.* 2015, **51**, 2798-2801.
